# Supplementary material for: Glaciological and meteorological monitoring at LTER sites Mullwitzkees and Venedigerkees, Austria, 2006–2022
Source: Copernicus journal article supplement (doi:10.5194/essd-2023-523), 2024-03-08
Supplement: Supplementary file 1 [file essd-2023-523-supplement.pdf]

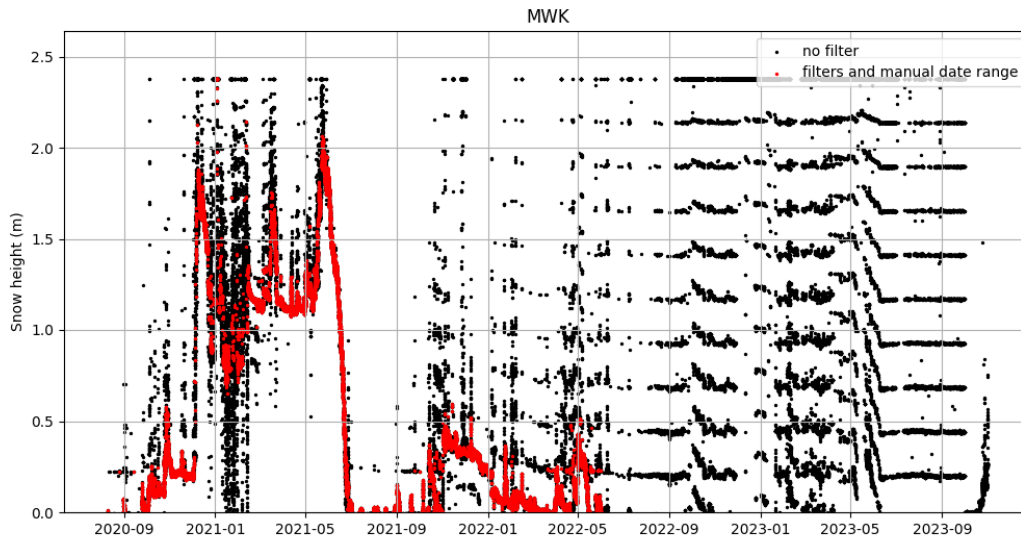

Fig. S1: Snow depth data at AWS\_MWK for the period of record. The red values represent an outlier filtered data set. No attempts were made to extract a meaningful signal after June 2022 due to the deterioration of the data quality.

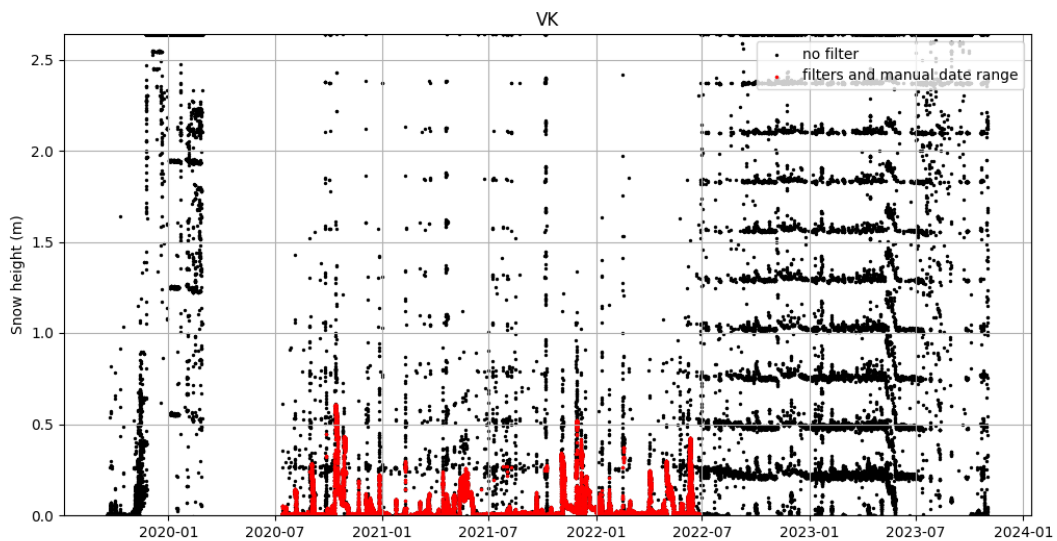

Fig. S2: Snow depth data at AWS\_VK for the period of record. The red values represent an outlier filtered data set. No attempts were made to extract a meaningful signal after July 2022 due to the deterioration of the data quality.

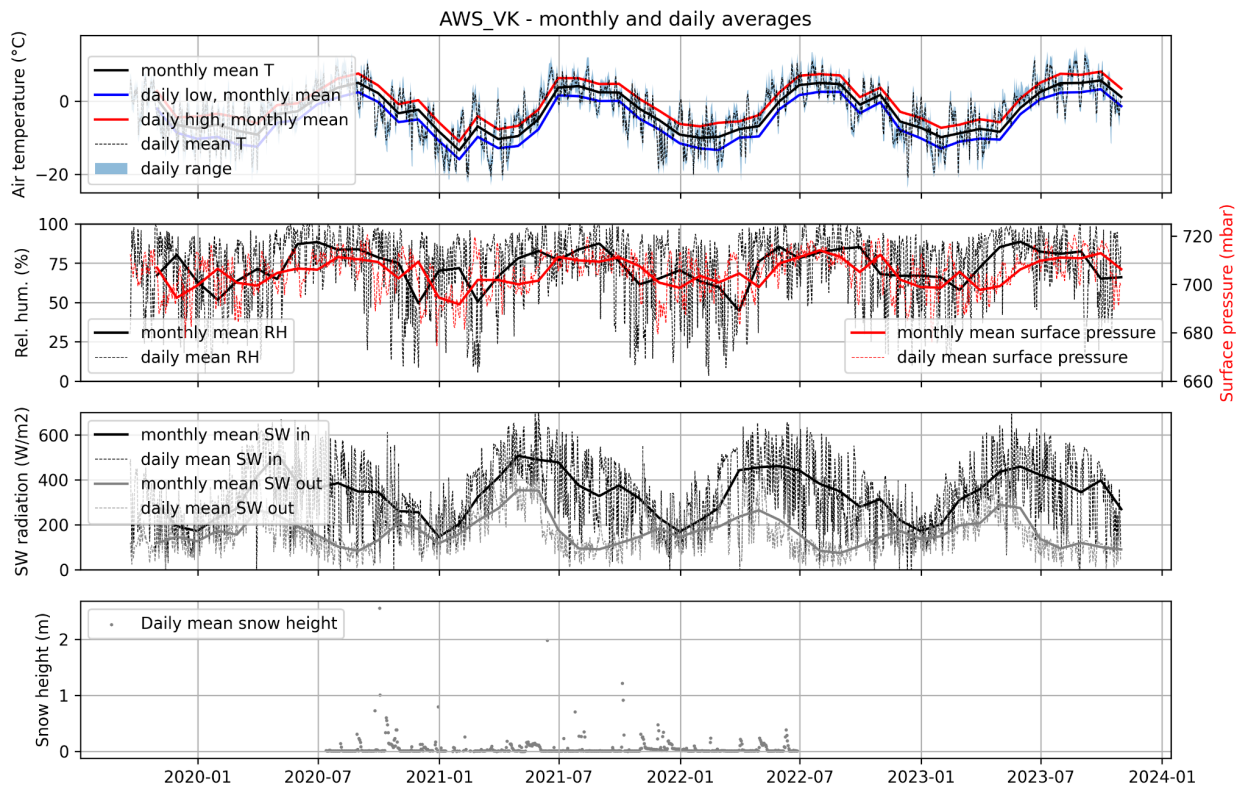

Fig. S3: Daily and monthly averages for air temperature, relative humidity, surface air pressure, shortwave incoming and outgoing radiation and snow depth at AWS\_VK.

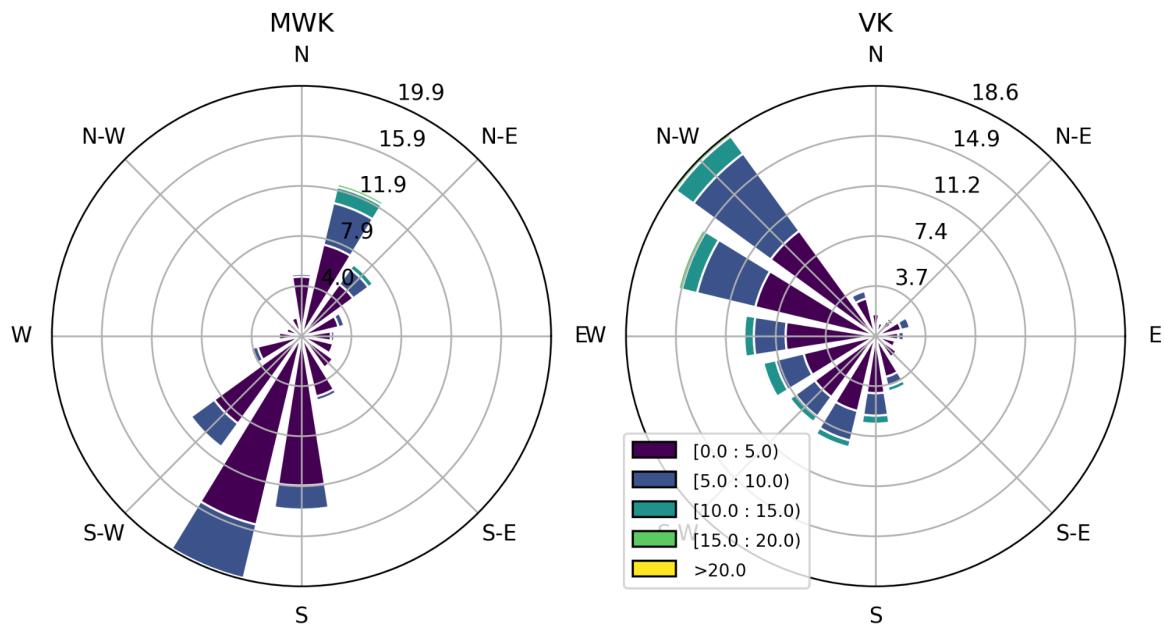

Fig. S4: Wind roses for AWS\_MWK and AWS\_VK. Colors: Wind speed (m/s). Radial axis: percentage of measurements.
